# Supplementary material for: Microbiome Analysis of Mucosal Ileoanal Pouch in Ulcerative Colitis Patients Revealed Impairment of the Pouches Immunometabolites
Source: MDPI journal article supplement (doi:10.3390/cells10113243), 2021-11-19
Supplement: s1 [file s1]

# Supplementary File 1

## 1.1. Sequencing and alignment statistics.

First column: sample identifiers; “#non-chimeric” column indicates the number of high quality sequences per sample. Analysis performed by QIIME2 Suite (Supplementary File 4 for details).

| Sample ID | # reads | # filtered | % filtered | #de-noised | #merged | % input merged | # non-chimeric | % non-chimeric |
|-----------|---------|------------|------------|------------|---------|----------------|----------------|----------------|
| 324RDA    | 92597   | 27025      | 29.19      | 26169      | 25565   | 27.61          | 6736           | 7.27           |
| 373DSE    | 239996  | 157973     | 65.82      | 155992     | 152061  | 63.36          | 30714          | 12.8           |
| 381BA     | 191270  | 141402     | 73.93      | 140200     | 138241  | 72.28          | 27350          | 14.3           |
| 396QL     | 103638  | 30946      | 29.86      | 29967      | 29239   | 28.21          | 6111           | 5.9            |
| 415CP     | 169072  | 123110     | 72.82      | 122070     | 120794  | 71.45          | 21865          | 12.93          |
| 432MF     | 185587  | 139226     | 75.02      | 137387     | 134685  | 72.57          | 19127          | 10.31          |
| 436CG     | 590780  | 420239     | 71.13      | 412225     | 375921  | 63.63          | 40434          | 6.84           |
| 438RNP    | 178562  | 134226     | 75.17      | 132505     | 126804  | 71.01          | 22106          | 12.38          |
| 451FV     | 228395  | 156059     | 68.33      | 153696     | 147943  | 64.78          | 29097          | 12.74          |
| 455CG     | 175890  | 126007     | 71.64      | 124786     | 122565  | 69.68          | 28539          | 16.23          |
| 469CS     | 77146   | 60214      | 78.05      | 59642      | 58395   | 75.69          | 8387           | 10.87          |
| 474SA     | 167525  | 53199      | 31.76      | 52379      | 51804   | 30.92          | 6620           | 3.95           |
| 475PMM    | 92711   | 71005      | 76.59      | 70294      | 69038   | 74.47          | 12715          | 13.71          |
| 476SS     | 107285  | 79954      | 74.52      | 78715      | 76924   | 71.7           | 14023          | 13.07          |
| 477CB     | 174201  | 119711     | 68.72      | 117258     | 110156  | 63.23          | 26789          | 15.38          |
| 502SC     | 96567   | 22286      | 23.08      | 21936      | 21439   | 22.2           | 5729           | 5.93           |
| 5064VC    | 187186  | 61004      | 32.59      | 60479      | 59300   | 31.68          | 8928           | 4.77           |
| 5062CV    | 119213  | 38821      | 32.56      | 38176      | 37583   | 31.53          | 6072           | 5.09           |
| 509CZG    | 655757  | 209431     | 31.94      | 207555     | 201329  | 30.7           | 39200          | 5.98           |
| 5161OE    | 438731  | 134020     | 30.55      | 132736     | 128673  | 29.33          | 27169          | 6.19           |
| 5165OE    | 416490  | 127614     | 30.64      | 126680     | 123076  | 29.55          | 26913          | 6.46           |
| 524SN     | 314371  | 97568      | 31.04      | 96857      | 95867   | 30.49          | 20657          | 6.57           |
| 525CM     | 743494  | 241900     | 32.54      | 238028     | 218771  | 29.42          | 18420          | 2.48           |
| 526TV     | 31610   | 9314       | 29.47      | 9085       | 8787    | 27.8           | 1953           | 6.18           |
| 529AE     | 135043  | 45777      | 33.9       | 45029      | 44329   | 32.83          | 7294           | 5.4            |
| 537AA     | 101961  | 33675      | 33.03      | 33132      | 32696   | 32.07          | 8892           | 8.72           |
| 539PM     | 190896  | 59109      | 30.96      | 58264      | 57351   | 30.04          | 12803          | 6.71           |
| 541TG     | 284090  | 95700      | 33.69      | 95084      | 94141   | 33.14          | 15803          | 5.56           |
| 607SL     | 382407  | 125985     | 32.95      | 124987     | 123430  | 32.28          | 20574          | 5.38           |
| 622PG     | 202172  | 61485      | 30.41      | 60936      | 59905   | 29.63          | 13090          | 6.47           |
| 648FM     | 61991   | 41134      | 66.35      | 39942      | 38842   | 62.66          | 8848           | 14.27          |
| 689TFP    | 86764   | 24243      | 27.94      | 23412      | 23114   | 26.64          | 5858           | 6.75           |
| 707LA     | 98716   | 32181      | 32.6       | 31659      | 31285   | 31.69          | 7920           | 8.02           |
| 709DPG    | 193336  | 118177     | 61.13      | 116559     | 112444  | 58.16          | 22257          | 11.51          |
| CON015    | 255365  | 196315     | 76.88      | 194364     | 189279  | 74.12          | 24882          | 9.74           |
| CON016    | 116845  | 87151      | 74.59      | 86199      | 84030   | 71.92          | 18466          | 15.8           |
| CON017    | 94682   | 73412      | 77.54      | 72087      | 70313   | 74.26          | 12671          | 13.38          |
| CON018    | 286955  | 232609     | 81.06      | 230557     | 224396  | 78.2           | 38565          | 13.44          |
| CON019    | 127674  | 98086      | 76.83      | 96465      | 93725   | 73.41          | 16382          | 12.83          |
| CON020    | 114042  | 89346      | 78.34      | 87928      | 85189   | 74.7           | 13839          | 12.14          |
| CON021    | 120686  | 93008      | 77.07      | 91514      | 89329   | 74.02          | 14020          | 11.62          |
| CON003    | 666215  | 530237     | 79.59      | 526656     | 514195  | 77.18          | 75204          | 11.29          |
| CON004    | 109006  | 86310      | 79.18      | 84938      | 82175   | 75.39          | 14419          | 13.23          |
| CON459    | 75827   | 22125      | 29.18      | 21662      | 20858   | 27.51          | 6046           | 7.97           |

|        |        |        |       |        |        |       |       |       |
|--------|--------|--------|-------|--------|--------|-------|-------|-------|
| CON617 | 239948 | 72273  | 30.12 | 71239  | 67608  | 28.18 | 9106  | 3.79  |
| CON618 | 64539  | 19909  | 30.85 | 19216  | 17008  | 26.35 | 3549  | 5.5   |
| CON629 | 117204 | 36621  | 31.25 | 35923  | 32953  | 28.12 | 4910  | 4.19  |
| CON630 | 308617 | 98145  | 31.8  | 97182  | 94929  | 30.76 | 16574 | 5.37  |
| CON631 | 264574 | 86432  | 32.67 | 84970  | 82165  | 31.06 | 9600  | 3.63  |
| CON633 | 80548  | 27673  | 34.36 | 27173  | 26294  | 32.64 | 6281  | 7.8   |
| CON638 | 131206 | 43103  | 32.85 | 42071  | 39673  | 30.24 | 6962  | 5.31  |
| CON645 | 152227 | 49299  | 32.39 | 48045  | 45274  | 29.74 | 8246  | 5.42  |
| CON007 | 206676 | 136952 | 66.26 | 134258 | 126255 | 61.09 | 25518 | 12.35 |

**1.2. Feature distribution per sample (“per sample” column) and global feature distribution (“per feature”).**

|                          | Per sample | Per feature |
|--------------------------|------------|-------------|
| Min. frequency           | 1953       | 1           |
| 1st quartile             | 7920       | 9           |
| Median frequency         | 14020      | 22          |
| 3 <sup>rd</sup> quartile | 22257      | 53          |
| Max. frequency           | 75204      | 26456       |
| Mean frequency           | 17061      | 193.25      |

The number of high quality sequence count ranges from 1953 to 75204, while feature abundance ranges from 1 to 26456 counts.

### 1.3. Sample-specific composition

Bar plot showing relative frequencies of the Top30 most abundant taxa across investigated samples: frequencies are shown at Family (QIIME2 “level 5”) level. Feature quantification, taxonomic assignment and phylogenetic tree reconstruction were carried out through QIIME2 Suite (see Materials and Methods for details). Samples are ordered by class and sample names. Plot obtained through the “Taxonomic Bar Plots” application in QIIME2 website (<https://view.qiime2.org/>).

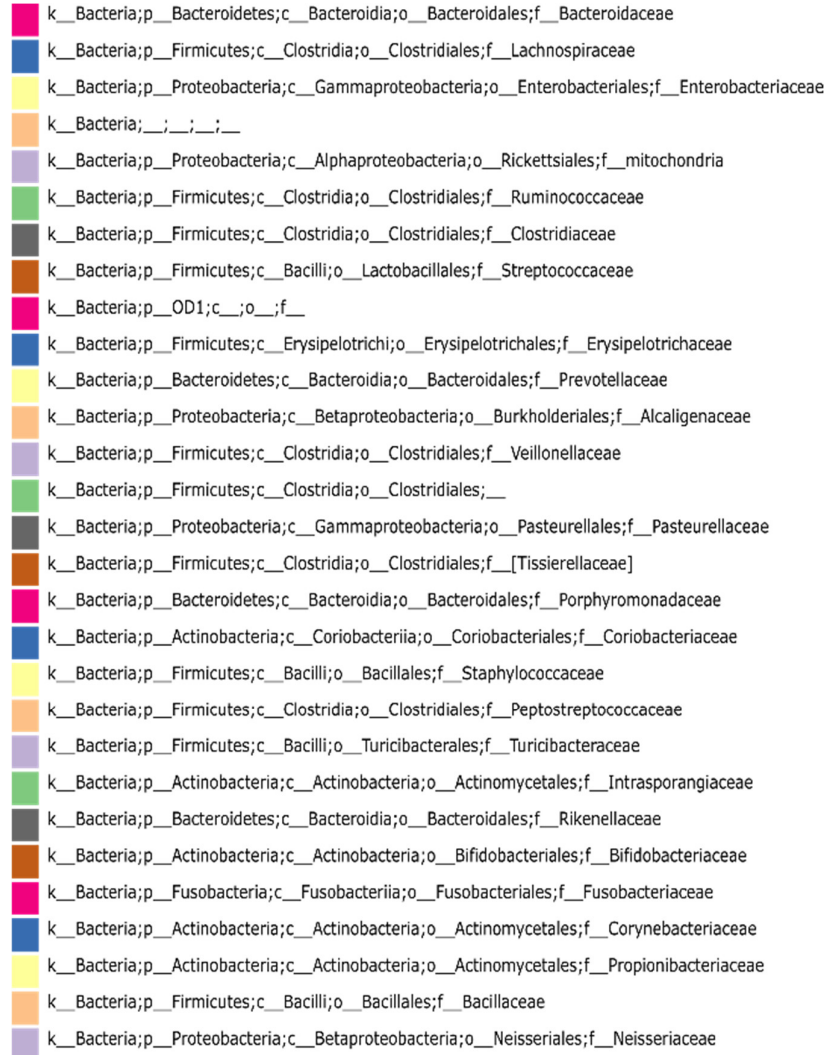

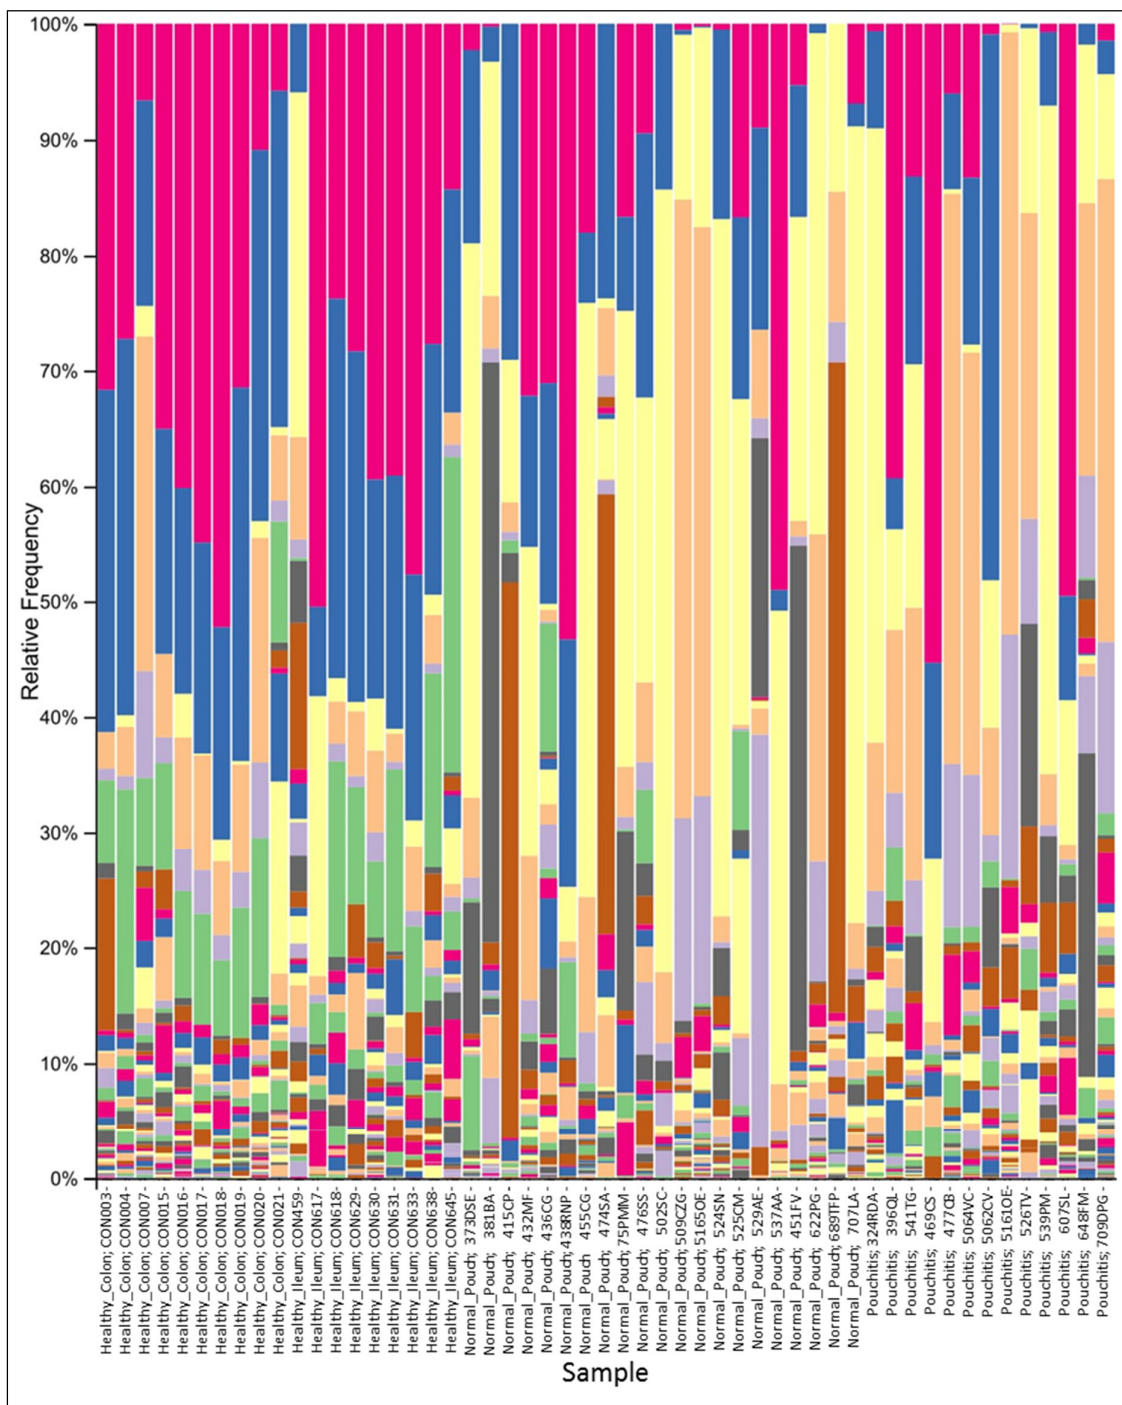

### 1.4. Alpha diversity analysis.

We investigated Alpha diversity by calculating four different measures: Pielou's evenness (1.4.1), Faith's Phylogenetic Distance (1.4.2), Number of Observed Features (1.4.3) and Shannon's entropy (1.4.4). For each index, the following outcomes are provided: boxplot for group-specific index distribution (x-axis: 4 groups, "Healthy Colon", "Healthy Ileum", "Normal Pouch", "Pouchitis", y-axis: alpha-diversity index); Kruskal-Wallis test results (H statistics; p-value) for the global comparison of group-specific distribution; Kruskal-Wallis test results for pairwise group comparisons. Boxplot 1.4.4 is also reported in the main text, Figure 2. Analyses were performed through the "QIIME2 Diversity" module, using "4910" as cut-off for reads sampling depth (see main text for further details).

#### 1.4.1-. Pielou's evenness

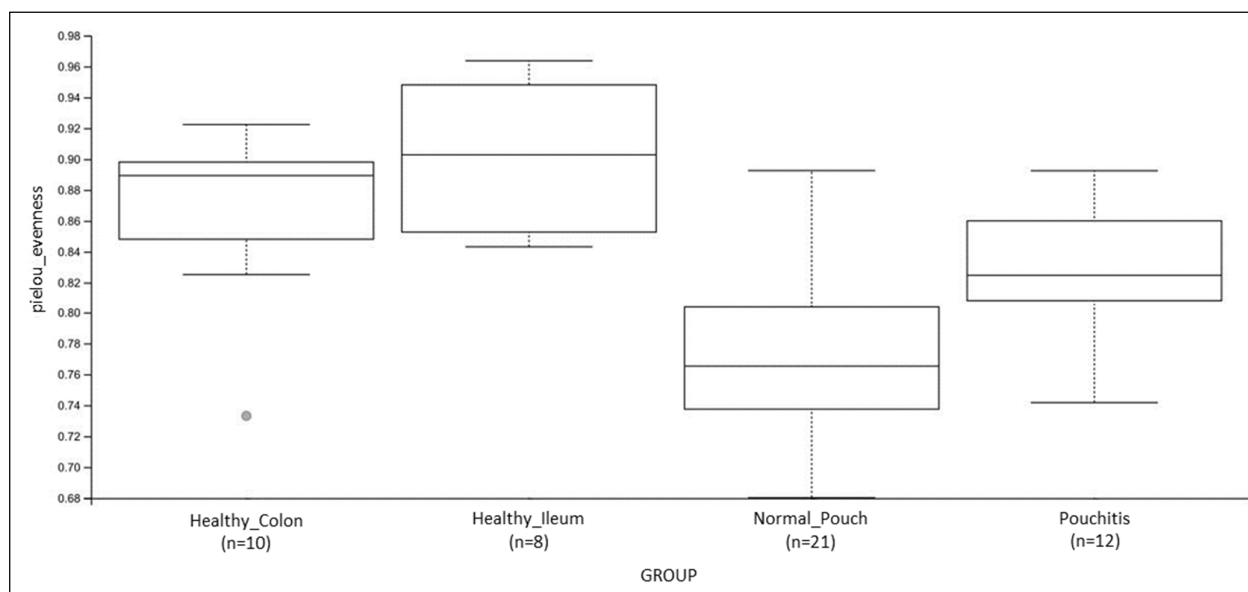

Kruskal-Wallis test (all groups): H = 23.94351; p-value= 0.00002

Kruskal-Wallis test (pairwise):

| Group 1       | Group 2       | H        | p-value | q-value |
|---------------|---------------|----------|---------|---------|
| Healthy_Colon | Healthy_Ileum | 1.13684  | 0.28632 | 0.28632 |
| Healthy_Colon | Normal_Pouch  | 10.86428 | 0.00098 | 0.00294 |
| Healthy_Colon | Pouchitis     | 4.73478  | 0.02955 | 0.03547 |
| Healthy_Ileum | Normal_Pouch  | 13.75238 | 0.00021 | 0.00125 |
| Healthy_Ileum | Pouchitis     | 7.71428  | 0.00547 | 0.01095 |
| Normal_Pouch  | Pouchitis     | 6.86274  | 0.0088  | 0.0132  |

### 1.4.2-. Faith's Phylogenetic Distance

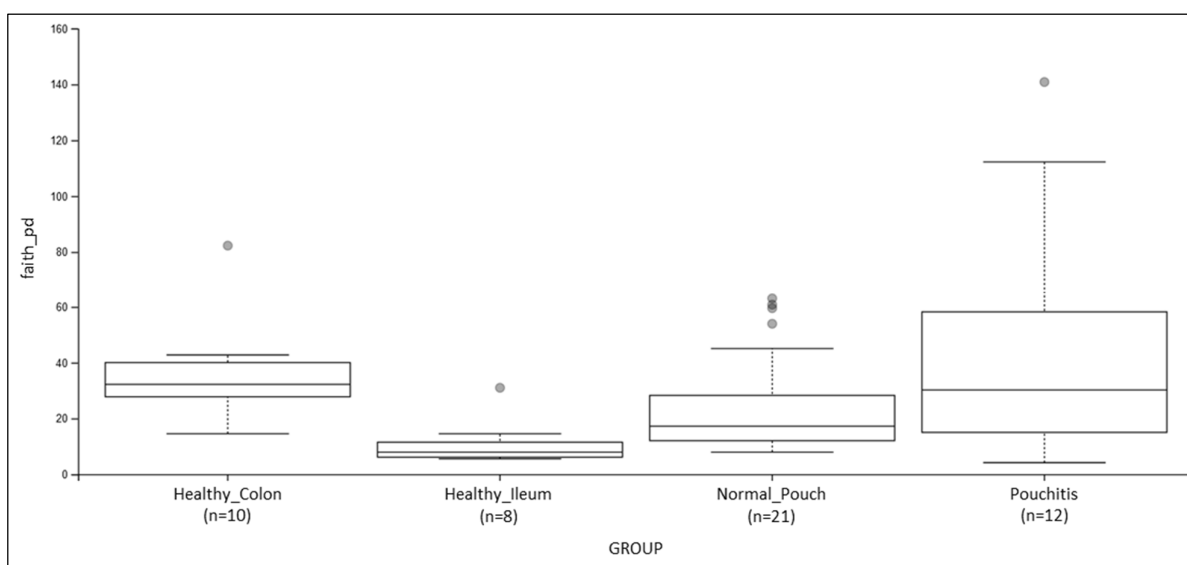

Kruskal-Wallis test (all groups):  $H = 13.28014$ ;  $p\text{-value} = 0.00406$

Kruskal-Wallis test (pairwise):

| Group 1       | Group 2       | H        | p-value | q-value |
|---------------|---------------|----------|---------|---------|
| Healthy_Colon | Healthy_Ileum | 10.23157 | 0.00138 | 0.00828 |
| Healthy_Colon | Normal_Pouch  | 4.11428  | 0.04252 | 0.06378 |
| Healthy_Colon | Pouchitis     | 0.03913  | 0.84319 | 0.84319 |
| Healthy_Ileum | Normal_pouch  | 6.68809  | 0.00971 | 0.02179 |
| Healthy_Ileum | Pouchitis     | 6.48214  | 0.01089 | 0.02179 |
| Normal_Pouch  | Pouchitis     | 1.17787  | 0.27778 | 0.33334 |

### 1.4.3-. Number of Observed Features

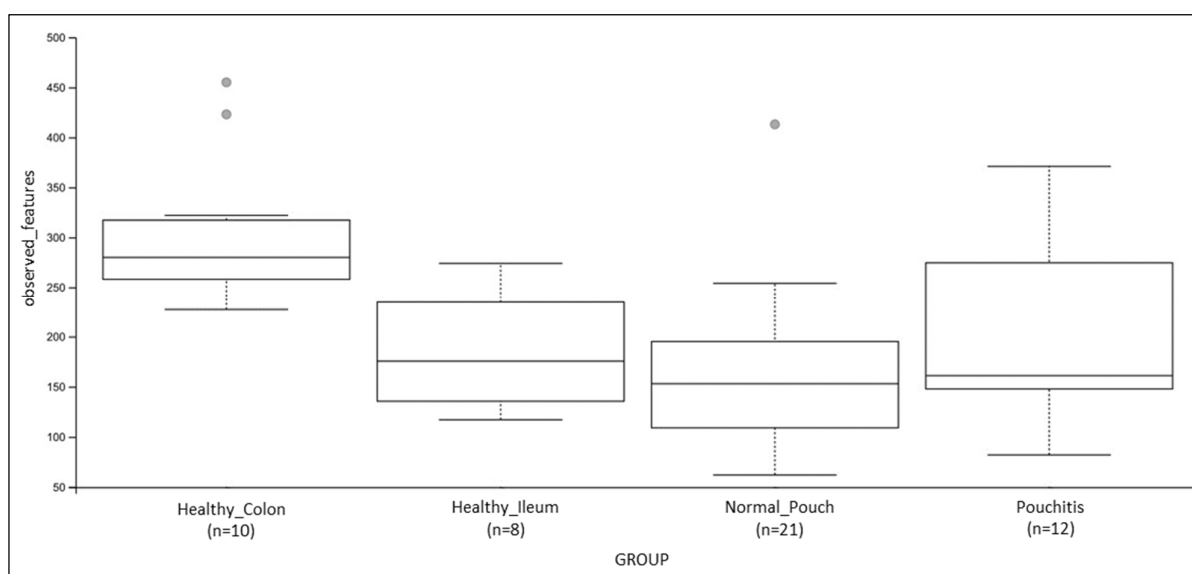

Kruskal-Wallis test (all groups): H = 16.67914; p-value= 0.00082

Kruskal-Wallis test (pairwise):

| Group 1       | Group 2       | H        | p-value     | q-value |
|---------------|---------------|----------|-------------|---------|
| Healthy_Colon | Healthy_Ileum | 8.08421  | 0.00446     | 0.01339 |
| Healthy_Colon | Normal_Pouch  | 15.44775 | 8.48175e-05 | 0.00051 |
| Healthy_Colon | Pouchitis     | 5.02608  | 0.02496     | 0.04993 |
| Healthy_Ileum | Normal_Pouch  | 1.37176  | 0.24151     | 0.28981 |
| Healthy_Ileum | Pouchitis     | 0.29166  | 0.58915     | 0.58915 |
| Normal_Pouch  | Pouchitis     | 1.61905  | 0.20322     | 0.28988 |

#### 1.4.4-. Shannon entropy

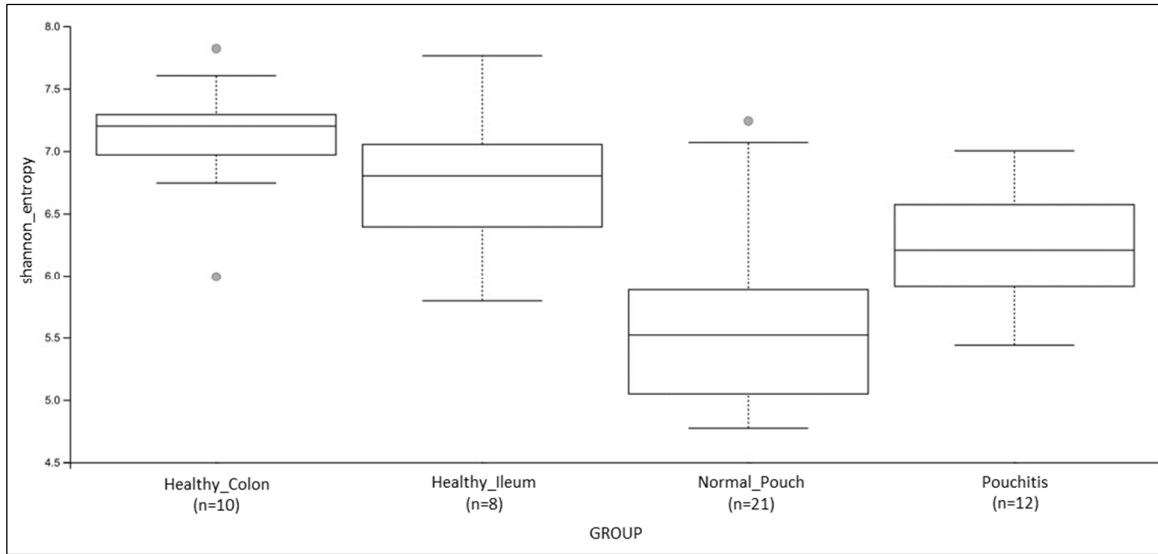

Kruskal-Wallis test (all groups): H = 25.10759; p-value= 0.00001

Kruskal-Wallis test (pairwise):

| Group 1       | Group 2       | H        | p-value | q-value |
|---------------|---------------|----------|---------|---------|
| Healthy_Colon | Healthy_Ileum | 2.02105  | 0.15513 | 0.15513 |
| Healthy_Colon | Normal_Pouch  | 15.77857 | 7.1e-05 | 0.00042 |
| Healthy_Colon | Pouchitis     | 10.43913 | 0.00123 | 0.00371 |
| Healthy_Ileum | Normal_Pouch  | 9.15238  | 0.00248 | 0.00496 |
| Healthy_Ileum | Pouchitis     | 2.38095  | 0.12282 | 0.14738 |
| Normal_Pouch  | Pouchitis     | 7.46358  | 0.00629 | 0.00944 |

#### 1.5-. Beta diversity analysis.

Diversity among the four groups has been evaluated by considering four popular dissimilarity/distance methods: Bray-Curtis (1.5.1), Jaccard (1.5.2), Unweighted and Weighted Unifrac (1.5.3 and 1.5.4). For each method, the following outcomes are provided: a screenshot of three-dimensional Principal Coordinate Analysis ("3D-PCoA") plot; a table summarizing PERMANOVA test results for pairwise group comparisons.

PCoA plots have been obtained by using the Emperor web-application within QIIME2 website (<https://view.qiime2.org/>); red dots indicate "Healthy Colon" samples; blue: "Healthy Ileum"; orange for Normal "Pouch"; green for "Pouchitis". Furthermore, each table show details on comparing groups and their size, number of permutations, pseudo-F statistics, p-values and Benjamini-Hochberg adjusted p-value. PERMANOVA verifies the hypothesis that distances among samples with one class group differ from distances of these samples from samples of other groups.

PCoA plot obtained by using Jaccard distance is also reported in Main Text, as Figure 3.

#### 1.5.1-. Bray-Curtis

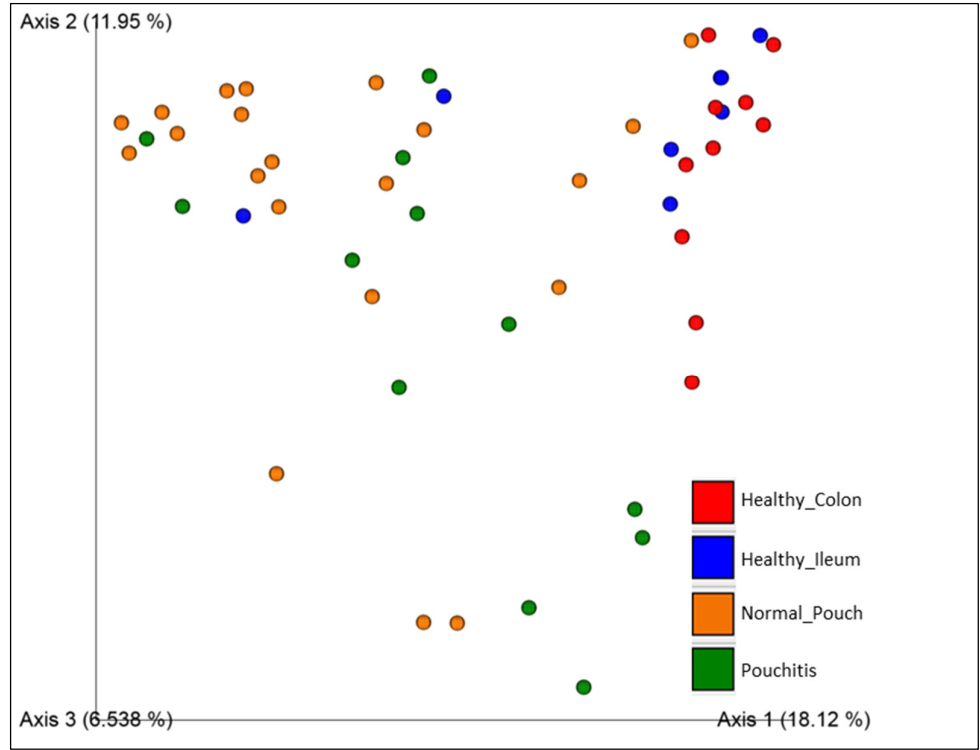

| Group 1           | Group 2           | Sample size | Permuta-<br>tions | pseudo-F | p-value | q-value |
|-------------------|-------------------|-------------|-------------------|----------|---------|---------|
| Healthy_Col<br>on | Healthy_Ile<br>um | 18          | 999               | 1.32284  | 0.096   | 0.096   |
| Healthy_Col<br>on | Nor-<br>mal_Pouch | 31          | 999               | 5.31268  | 0.001   | 0.002   |
| Healthy_Col<br>on | Pouchitis         | 22          | 999               | 3.67678  | 0.001   | 0.002   |
| Healthy_Ile<br>um | Nor-<br>mal_Pouch | 29          | 999               | 2.98257  | 0.003   | 0.00451 |
| Healthy_Ile<br>um | Pouchitis         | 20          | 999               | 2.43851  | 0.001   | 0.002   |
| Nor-<br>mal_Pouch | Pouchitis         | 33          | 999               | 1.57663  | 0.076   | 0.09    |

### 1.5.2-. Jaccard

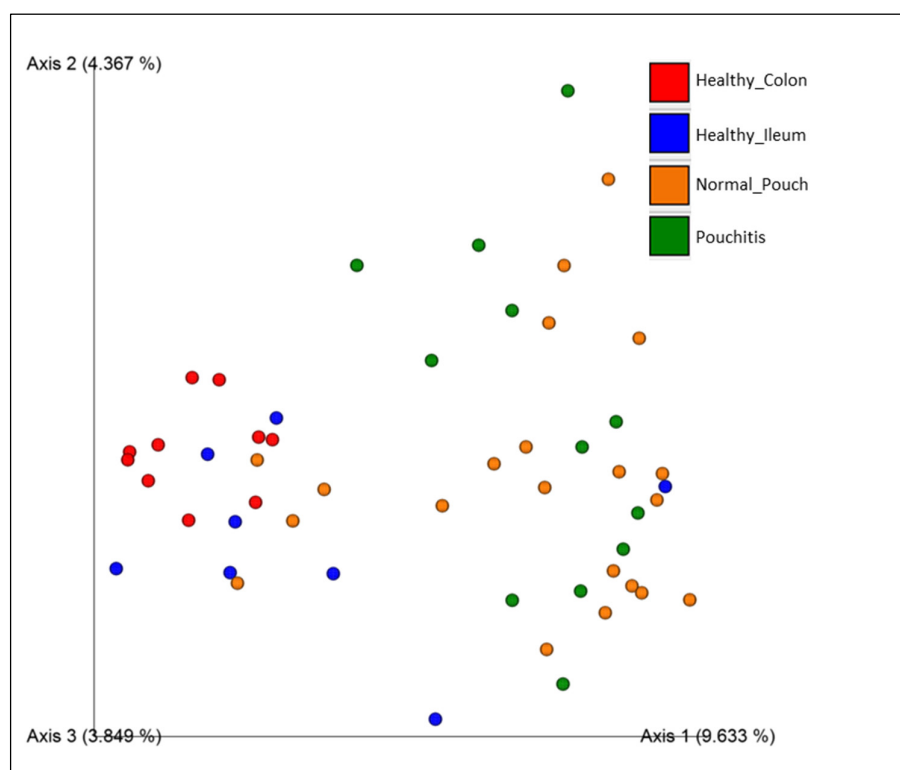

| Group 1       | Group 2       | Sample size | Permutations | pseudo-F | p-value | q-value |
|---------------|---------------|-------------|--------------|----------|---------|---------|
| Healthy_Colon | Healthy_Ileum | 18          | 999          | 1.31431  | 0.019   | 0.02279 |
| Healthy_Colon | Normal_Pouch  | 31          | 999          | 2.86588  | 0.001   | 0.0015  |
| Healthy_Colon | Pouchitis     | 22          | 999          | 2.65488  | 0.001   | 0.0015  |
| Healthy_Ileum | Normal_Pouch  | 29          | 999          | 1.73343  | 0.001   | 0.0015  |
| Healthy_Ileum | Pouchitis     | 20          | 999          | 1.68959  | 0.001   | 0.0015  |
| Normal_Pouch  | Pouchitis     | 33          | 999          | 1.06149  | 0.239   | 0.239   |

### 1.5.3-. Unweighted Unifrac

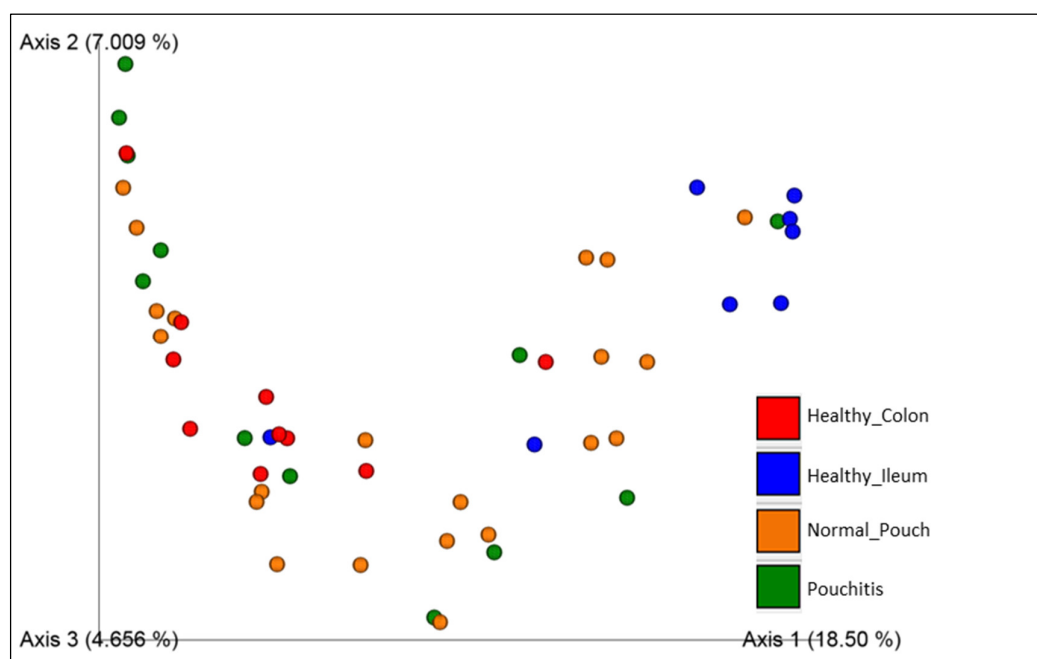

| Group 1       | Group 2       | Sample size | Permutations | pseudo-F | p-value | q-value |
|---------------|---------------|-------------|--------------|----------|---------|---------|
| Healthy_Colon | Healthy_Ileum | 18          | 999          | 4.43671  | 0.003   | 0.006   |
| Healthy_Colon | Normal_Pouch  | 31          | 999          | 1.80997  | 0.003   | 0.006   |
| Healthy_Colon | Pouchitis     | 22          | 999          | 1.47816  | 0.053   | 0.0636  |
| Healthy_Ileum | Normal_Pouch  | 29          | 999          | 2.71733  | 0.002   | 0.006   |
| Healthy_Ileum | Pouchitis     | 20          | 999          | 2.90128  | 0.008   | 0.012   |
| Normal_Pouch  | Pouchitis     | 33          | 999          | 0.95126  | 0.496   | 0.496   |

#### 1.5.4-. Weighted Unifrac

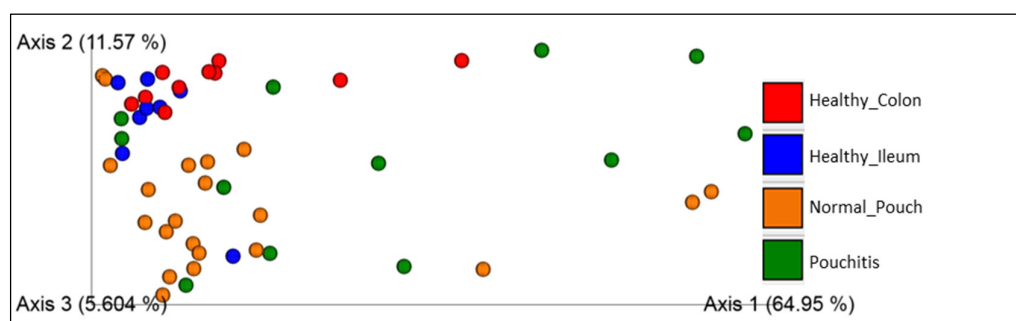

| Group 1       | Group 2       | Sample size | Permutations | pseudo-F | p-value | q-value |
|---------------|---------------|-------------|--------------|----------|---------|---------|
| Healthy_Colon | Healthy_Ileum | 18          | 999          | 2.73618  | 0.025   | 0.0375  |
| Healthy_Colon | Normal_Pouch  | 31          | 999          | 3.91585  | 0.013   | 0.0375  |
| Healthy_Colon | Pouchitis     | 22          | 999          | 4.02731  | 0.022   | 0.0375  |
| Healthy_Ileum | Normal_Pouch  | 29          | 999          | 2.61983  | 0.052   | 0.052   |
| Healthy_Ileum | Pouchitis     | 20          | 999          | 5.63246  | 0.006   | 0.036   |
| Normal_Pouch  | Pouchitis     | 33          | 999          | 3.53156  | 0.04    | 0.048   |

#### 1.6. ANCOM

QIIME2 ANCOM module was used to infer microbial genera or species that are differentially abundant across sample groups. Rare features and mitochondrial/plastid sequences were removed from the feature table (see Methods). Thus, features were collapsed according to QIIME2 taxonomical classification (based on GreenGenes resource) into “genus-collapsed” (“level 6”) and “species-collapsed” (“level 7”) features, for a total of, respectively, 66 and 95 features. For both strategies, ANCOM Volcano Plot and statistical results table are provided.

Significant features are placed on the top-right corner of the Volcano Plot; the first table shows significant features together with the corresponding W statistics, i.e., the number of sub-hypotheses that have passed for a certain feature (ANCOM compares pairs of feature relative abundances). The second table shows the percentile abundance of relevant features across the sample groups. For example, a value of 100 at 50% percentile indicates that the detected feature has a maximum sequence count of 100 in the 50% of samples of an investigated group.

1.6.1-. Results for genus-collapsed features (N = 66)

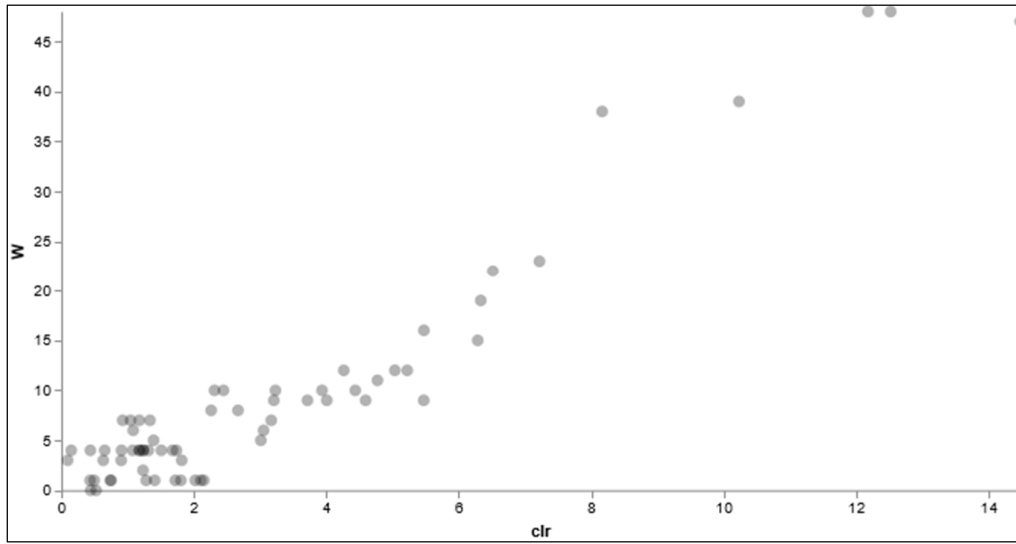

| Feature                                                                                       | W  |
|-----------------------------------------------------------------------------------------------|----|
| k_Bacteria;p_Firmicutes;c_Clostridia;o_Clostridiales;f_Ruminococcaceae;g_Faecalibacterium     | 48 |
| k_Bacteria;p_Proteobacteria;c_Gammaproteobacteria;o_Enterobacteriales;f_Enterobacteriaceae;__ | 48 |
| k_Bacteria;p_Firmicutes;c_Clostridia;o_Clostridiales;f_Ruminococcaceae;g_Gemmiger             | 47 |

| Percentile | Group         | k_Bacteria;p_Firmicutes;c_Clostridia;o_Clostridiales;f_Ruminococcaceae;g_Faecalibacterium | k_Bacteria;p_Firmicutes;c_Clostridia;o_Clostridiales;f_Ruminococcaceae;g_Gemmiger | k_Bacteria;p_Proteobacteria;c_Gammaproteobacteria;o_Enterobacteriales;f_Enterobacteriaceae;__ |
|------------|---------------|-------------------------------------------------------------------------------------------|-----------------------------------------------------------------------------------|-----------------------------------------------------------------------------------------------|
|            | W             | 48                                                                                        | 47                                                                                | 48                                                                                            |
| 0.0        | Healthy_Colon | 643.0                                                                                     | 68.0                                                                              | 1.0                                                                                           |
| 25.0       | Healthy_Colon | 784.75                                                                                    | 130.5                                                                             | 25.75                                                                                         |
| 50.0       | Healthy_Colon | 1007.0                                                                                    | 259.0                                                                             | 120.5                                                                                         |
| 75.0       | Healthy_Colon | 1348.75                                                                                   | 372.75                                                                            | 546.25                                                                                        |
| 100.0      | Healthy_Colon | 2535.0                                                                                    | 1438.0                                                                            | 688.0                                                                                         |
| 0.0        | Healthy_Ileum | 1.0                                                                                       | 1.0                                                                               | 1.0                                                                                           |
| 25.0       | Healthy_Ileum | 227.0                                                                                     | 92.0                                                                              | 40.0                                                                                          |
| 50.0       | Healthy_Ileum | 231.0                                                                                     | 144.0                                                                             | 123.0                                                                                         |
| 75.0       | Healthy_Ileum | 621.0                                                                                     | 222.0                                                                             | 743.0                                                                                         |
| 100.0      | Healthy_Ileum | 1092.0                                                                                    | 279.0                                                                             | 2090.0                                                                                        |
| 0.0        | Normal_Pouch  | 1.0                                                                                       | 1.0                                                                               | 1.0                                                                                           |
| 25.0       | Normal_Pouch  | 1.0                                                                                       | 1.0                                                                               | 2686.0                                                                                        |
| 50.0       | Normal_Pouch  | 1.0                                                                                       | 1.0                                                                               | 4520.0                                                                                        |
| 75.0       | Normal_Pouch  | 59.0                                                                                      | 47.0                                                                              | 5465.0                                                                                        |
| 100.0      | Normal_Pouch  | 1337.0                                                                                    | 843.0                                                                             | 14689.0                                                                                       |
| 0.0        | Pouchitis     | 1.0                                                                                       | 1.0                                                                               | 62.0                                                                                          |
| 25.0       | Pouchitis     | 1.0                                                                                       | 1.0                                                                               | 312.0                                                                                         |
| 50.0       | Pouchitis     | 1.0                                                                                       | 1.0                                                                               | 1172.0                                                                                        |
| 75.0       | Pouchitis     | 91.0                                                                                      | 1.0                                                                               | 2577.0                                                                                        |
| 100.0      | Pouchitis     | 269.0                                                                                     | 311.0                                                                             | 7331.0                                                                                        |

### 1.6.2-. Results for species-collapsed features (N=95)

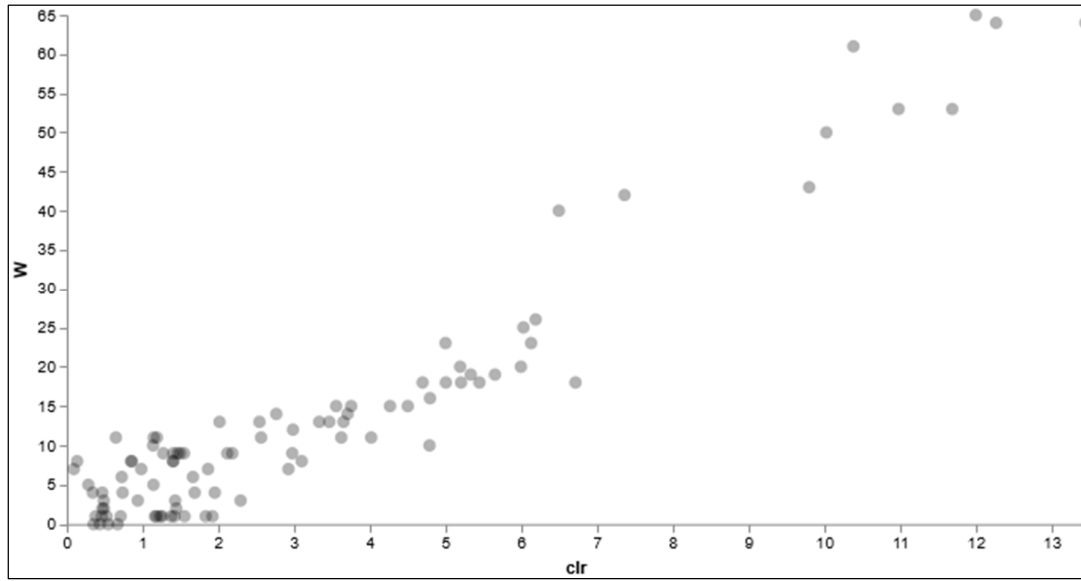

| Feature                                                                                                            | W  |
|--------------------------------------------------------------------------------------------------------------------|----|
| k__Bacteria;p__Firmicutes;c__Clostridia;o__Clostridiales;f__Ruminococcaceae;g__Faecalibacterium;s__prausnitzii [A] | 65 |
| k__Bacteria;p__Proteobacteria;c__Gammaproteobacteria;o__Enterobacteriales;f__Enterobacteriaceae;__ [B]             | 64 |
| k__Bacteria;p__Firmicutes;c__Clostridia;o__Clostridiales;f__Ruminococcaceae;g__Gemmiger;s__formicilis [C]          | 64 |
| k__Bacteria;p__Firmicutes;c__Clostridia;o__Clostridiales;f__Lachnospiraceae;g__Roseburia;__ [D]                    | 61 |
| k__Bacteria;p__Firmicutes;c__Clostridia;o__Clostridiales;f__Lachnospiraceae;g__Blautia;s__obeum [E]                | 53 |
| k__Bacteria;p__Firmicutes;c__Clostridia;o__Clostridiales;f__Lachnospiraceae;g__[Ruminococcus];s__torques [F]       | 53 |
| k__Bacteria;p__Bacteroidetes;c__Bacteroidia;o__Bacteroidales;f__Porphyromonadaceae;g__Parabacteroides;s__ [G]      | 50 |
| k__Bacteria;p__Firmicutes;c__Clostridia;o__Clostridiales;f__Lachnospiraceae;g__Dorea;s__formicigenans [H]          | 43 |
| k__Bacteria;p__Bacteroidetes;c__Bacteroidia;o__Bacteroidales;f__Bacteroidaceae;g__Bacteroides;s__uniformis [I]     | 42 |

| Percentile | Group         | [A]     | [B]    | [C]    | [D]    | [E]    | [F]   | [G]   | [H]    | [I]    |
|------------|---------------|---------|--------|--------|--------|--------|-------|-------|--------|--------|
|            | W             | 65      | 64     | 64     | 61     | 53     | 53    | 50    | 43     | 42     |
| 0.0        | Healthy_Colon | 643.0   | 68.0   | 1.0    | 314.0  | 1.0    | 1.0   | 1.0   | 1.0    | 1.0    |
| 25.0       | Healthy_Colon | 784.75  | 130.5  | 25.75  | 349.75 | 53.0   | 77.0  | 68.5  | 67.5   | 65.25  |
| 50.0       | Healthy_Colon | 1007.0  | 259.0  | 120.5  | 496.5  | 86.5   | 98.0  | 82.5  | 113.5  | 143.0  |
| 75.0       | Healthy_Colon | 1348.75 | 372.75 | 546.25 | 850.75 | 111.25 | 141.0 | 535.5 | 178.0  | 181.25 |
| 100.0      | Healthy_Colon | 2535.0  | 1438.0 | 688.0  | 1642.0 | 1809.0 | 208.0 | 931.0 | 1086.0 | 394.0  |
| 0.0        | Healthy_Ileum | 1.0     | 1.0    | 1.0    | 1.0    | 1.0    | 1.0   | 1.0   | 1.0    | 1.0    |
| 25.0       | Healthy_Ileum | 227.0   | 92.0   | 40.0   | 67.0   | 1.0    | 1.0   | 51.0  | 1.0    | 32.0   |
| 50.0       | Healthy_Ileum | 231.0   | 144.0  | 123.0  | 138.0  | 42.0   | 55.0  | 83.0  | 60.0   | 39.0   |
| 75.0       | Healthy_Ileum | 621.0   | 222.0  | 743.0  | 253.0  | 60.0   | 88.0  | 97.0  | 68.0   | 54.0   |
| 100.0      | Healthy_Ileum | 1092.0  | 279.0  | 2090.0 | 350.0  | 73.0   | 130.0 | 154.0 | 174.0  | 86.0   |

|       |              |        |       |         |        |       |       |       |       |       |
|-------|--------------|--------|-------|---------|--------|-------|-------|-------|-------|-------|
| 0.0   | Normal_Pouch | 1.0    | 1.0   | 1.0     | 1.0    | 1.0   | 1.0   | 1.0   | 1.0   | 1.0   |
| 25.0  | Normal_Pouch | 1.0    | 1.0   | 2686.0  | 1.0    | 1.0   | 1.0   | 1.0   | 1.0   | 1.0   |
| 50.0  | Normal_Pouch | 1.0    | 1.0   | 4520.0  | 1.0    | 1.0   | 1.0   | 1.0   | 1.0   | 1.0   |
| 75.0  | Normal_Pouch | 59.0   | 47.0  | 5465.0  | 92.0   | 1.0   | 1.0   | 1.0   | 26.0  | 1.0   |
| 100.0 | Normal_Pouch | 1337.0 | 843.0 | 14689.0 | 1124.0 | 144.0 | 118.0 | 208.0 | 112.0 | 277.0 |
| 0.0   | Pouchitis    | 1.0    | 1.0   | 62.0    | 1.0    | 1.0   | 1.0   | 1.0   | 1.0   | 1.0   |
| 25.0  | Pouchitis    | 1.0    | 1.0   | 312.0   | 1.0    | 1.0   | 1.0   | 1.0   | 1.0   | 1.0   |
| 50.0  | Pouchitis    | 1.0    | 1.0   | 1172.0  | 1.0    | 1.0   | 1.0   | 1.0   | 1.0   | 1.0   |
| 75.0  | Pouchitis    | 91.0   | 1.0   | 2577.0  | 57.0   | 1.0   | 1.0   | 1.0   | 1.0   | 1.0   |
| 100.0 | Pouchitis    | 269.0  | 311.0 | 7331.0  | 533.0  | 1.0   | 1.0   | 31.0  | 1.0   | 235.0 |
